# Supplementary material
Source: Springer Nature journal article supplement (https://www.springermedizin.de/resource/supplementary/12998_2005_21_MOESM1_ESM.pdf/9623388)

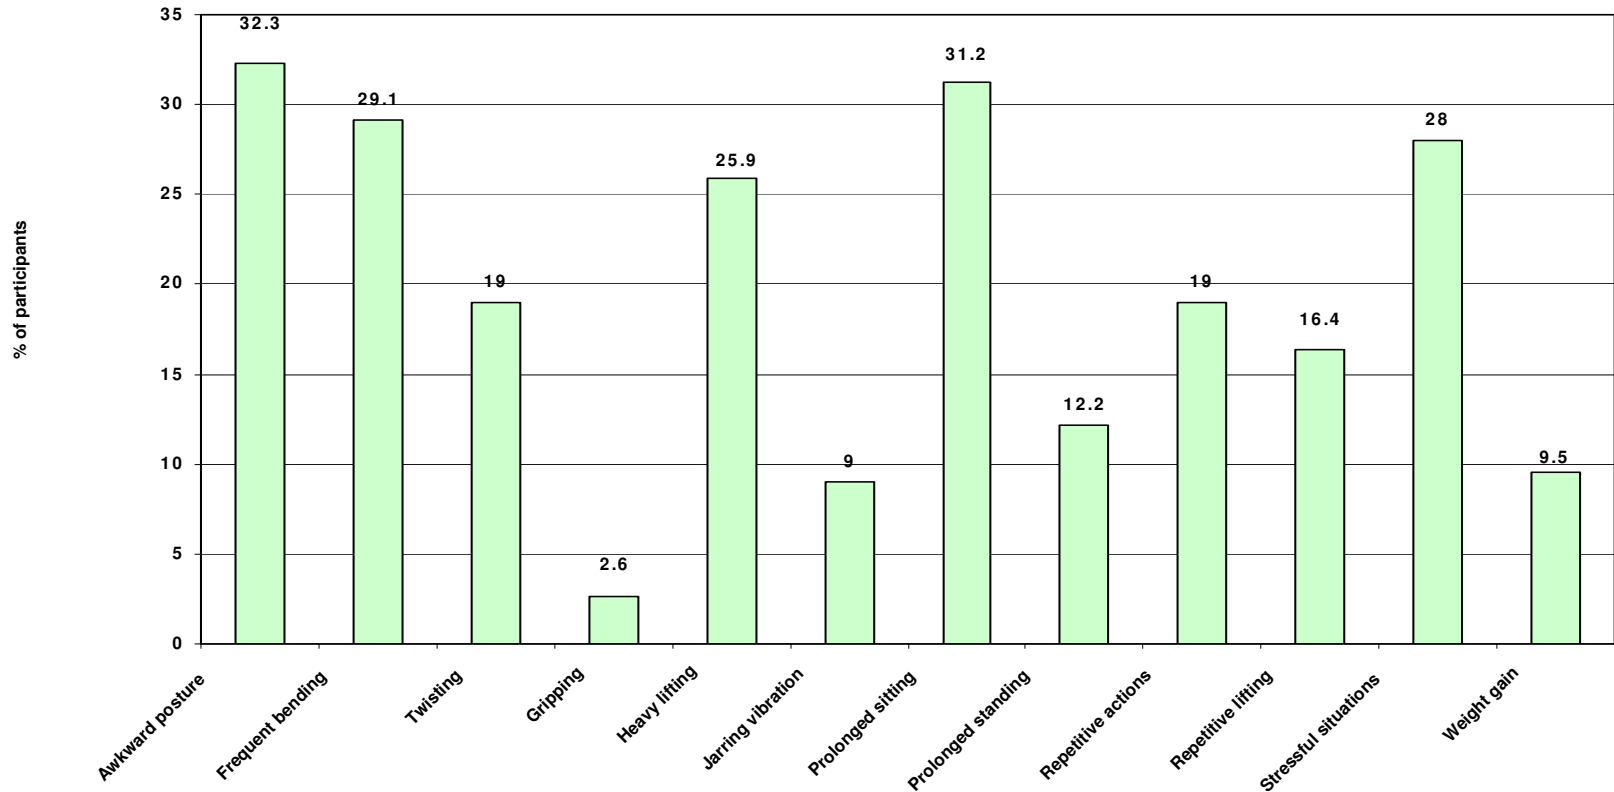

Supplement: MOESM1 [file 9623388]
